# 1 Intercellular Communication Controls Agonist-Induced Calcium 2 Oscillations Independently of Gap Junctions in Smooth Muscle Cells.

## 3 Authors

4 Suzanne E Stasiak<sup>1</sup>, Ryan R Jamieson<sup>1</sup>, Jeff Bouffard<sup>1,2</sup>, Erin .J. Cram<sup>2,1</sup>  
5 and Harikrishnan Parameswaran<sup>1\*</sup>

## 7 Affiliations

8 <sup>1</sup> Department of Bioengineering, Northeastern University, Boston, MA 02115.

9 <sup>2</sup> Department of Biology, Northeastern University, Boston, MA 02115.

11 \*Correspondence may be addressed to [h.parameswaran@northeastern.edu](mailto:h.parameswaran@northeastern.edu).

## 13 Abstract

14 In this study, we report the existence of a communication system among human smooth  
15 muscle cells that uses mechanical forces to frequency modulate long-range calcium waves.  
16 An important consequence of this mechanical signaling is that changes in stiffness of the  
17 underlying extracellular matrix can interfere with the frequency modulation of Ca<sup>2+</sup> waves  
18 causing smooth muscle cells from healthy human donors to falsely perceive a much higher  
19 agonist dose than they actually received. This aberrant sensing of contractile agonist dose  
20 on stiffer matrices is completely absent in isolated smooth muscle cells, even though the  
21 isolated cells can sense matrix rigidity. We show that the intercellular communication that  
22 enables this collective Ca<sup>2+</sup> response in smooth muscle cells does not involve transport  
23 across gap junctions or extracellular diffusion of signaling molecules. Instead, our data  
24 support a collective model in which mechanical signaling among smooth muscle cells  
25 regulates their response to contractile agonists.

## 26 **Introduction**

27 Excessive constriction of hollow, tubular transport organs including the airways and the  
28 vasculature is a common pathophysiological feature of widespread diseases like asthma and  
29 hypertension. The vessel/airway wall undergoes significant pathological changes in the  
30 smooth muscle and in the extracellular matrix (ECM) that surrounds and supports the cells  
31 with the onset of disease (1, 2). The search for mechanisms that underlie the development  
32 of these diseases and the search for novel therapies has largely focused on the smooth  
33 muscle cells (SMCs), as they are the primary effectors of constriction (3). Pathological  
34 changes in the ECM, on the other hand, have not received much attention (1, 4). More recent  
35 studies show that changes in the ECM can impact organ function at the very early stages,  
36 and can even precede the thickening of the muscle layer (5). Perhaps, mechanobiological  
37 interactions between healthy SMCs and an altered ECM are playing a more critical role in  
38 the pathogenesis and progression of diseases like asthma and hypertension than is currently  
39 appreciated. In this study, we examined how changes in the matrix stiffness can impact how  
40 SMCs sense the dose of an applied agonist.

41 Agonist-induced  $\text{Ca}^{2+}$  oscillations and long-range  $\text{Ca}^{2+}$  waves are critical mechanisms that  
42 regulate vital parameters such as blood pressure and airway resistance (6, 7). Binding of a  
43 muscle agonist, like histamine or acetylcholine, to a surface receptor on the SMC and the  
44 subsequent rise in cytosolic  $\text{Ca}^{2+}$  concentration, is the universal trigger for force generation  
45 in the smooth muscle (8). Agonist exposure induces  $\text{Ca}^{2+}$  oscillations in SMCs that  
46 propagate as waves within the smooth muscle layer (9). These agonist-induced  $\text{Ca}^{2+}$   
47 oscillations serve two critical functions in the smooth muscle: (A) The concentration/dose  
48 of agonist detected by the surface receptors is transduced into the frequency of  $\text{Ca}^{2+}$   
49 oscillations, with a higher concentration of muscle agonist resulting in a higher frequency

50 of  $\text{Ca}^{2+}$  oscillations, which can then be detected by downstream  $\text{Ca}^{2+}$  sensors and translated  
51 into a dose-dependent increase in smooth muscle contractility (6, 10). (B) Agonist-induced  
52  $\text{Ca}^{2+}$  oscillations propagate as waves around the circumference of the organ and enable the  
53 synchronized contractions of SMCs necessary to constrict the airway/blood vessels (9). At  
54 present, little is known about the role of extracellular mechanical factors such as ECM  
55 stiffness in regulating agonist-induced  $\text{Ca}^{2+}$  oscillations and  $\text{Ca}^{2+}$  waves that can move  
56 across an SMC ensemble.

57 In this study, we report a collective phenomenon in clusters of human airway smooth muscle  
58 cells, where ECM stiffness alters the intercellular communication between cells in an SMC  
59 ensemble causing increased  $\text{Ca}^{2+}$  oscillation frequencies and synchronized  $\text{Ca}^{2+}$  oscillations.  
60 This altered  $\text{Ca}^{2+}$  response results in a relative force increase by SMCs on stiff substrates.  
61 We examined intercellular transport of  $\text{Ca}^{2+}$  in SMC cells and we show that contrary to  
62 current dogma, the physical mechanism that enables intercellular  $\text{Ca}^{2+}$  waves does not  
63 involve molecular transport across gap junctions or paracrine signaling through  
64 extracellular diffusion. Rather, this phenomenon appears to be driven by force-transfer  
65 among cells in the cluster. The collective response of SMCs to agonist could be a  
66 mechanism by which matrix remodeling can drive disease progression in asthma and  
67 hypertension.

## 68 **Results**

### 69 **1. Matrix stiffness alters the $\text{Ca}^{2+}$ response to agonist in multicellular clusters of SMCs,** 70 **but not in isolated cells.**

71 Modeling the SMC layer in 2D using micropatterning: To study the role of altered matrix  
72 stiffness on the frequency of  $\text{Ca}^{2+}$  oscillations, we used micropatterning to create a 2D  
73 approximation of the organization of SMCs seen in lung slices (Fig. 1A, S1A). The substrate

74 we use is NuSil (11), an optically clear, non-porous polydimethylsiloxane substrate whose  
75 Young's modulus,  $E$ , can be varied in the range 0.3 kPa-70 kPa (11). Based on  
76 measurements of ECM stiffness in healthy human airways, we set the ECM stiffness of  
77 healthy human airways to  $E=0.3$  kPa (12). This matches the ECM stiffness of small airways  
78 (inner diameter  $<3$  mm) which are known to collapse in asthma (13). With the onset of  
79 airway remodeling, collagen is deposited in the airways and the stiffness of the ECM  
80 increases (1). A substrate stiffness of  $E=13$  kPa was used to mimic remodeled ECM. These  
81 ECM stiffness values are also representative of the two distinct regimes of mechanosensing  
82 seen in all adherent cells (14, 15). Using a  $Ca^{2+}$  sensitive fluorescent dye (Fluo4-AM), we  
83 imaged and quantified the time period of  $Ca^{2+}$  oscillations in these SM rings plated on soft  
84 and stiff ECM. Images were recorded at a rate of 1 per second for 5 minutes following  
85 exposure to  $10^{-5}$  M histamine. On soft ECM ( $E=0.3$  kPa), exposure to histamine resulted in  
86  $Ca^{2+}$  oscillations with a mean time period of  $43.64 \pm 1.45$  seconds ( $N=4$ , Fig. 1E). When the  
87 substrate stiffness was increased to  $E=13$  kPa, the same dose of agonist induced significantly  
88 faster oscillations with a mean time period of  $22.79 \pm 2.42$  seconds ( $N=4$ , t-test,  $P < 0.001$ ,  
89 Fig. 1E). Therefore, at the *same* dose of agonist, stiff substrates resulted in a doubling of the  
90 cytosolic  $Ca^{2+}$  oscillation frequency in healthy smooth muscle cells.

91 Interactions between ECM and isolated cells are insufficient to explain altered  $Ca^{2+}$   
92 response: To explain the role of matrix stiffness in regulating the  $Ca^{2+}$  response to a low  
93 dose of agonist, we first hypothesized that this phenomenon was linked to cell-matrix  
94 interactions at the level of the individual cell. With increased matrix stiffness, SMCs  
95 develop higher cytoskeletal prestress (15) opening stretch-activated  $Ca^{2+}$  channels (16) and  
96 potentially increasing the  $Ca^{2+}$  flux into the cell. To test this hypothesis, we cultured human  
97 airway SMCs at a low density such that individual cells were isolated, spaced at least 100  
98  $\mu\text{m}$  from each other (Fig. 1B, S1B). We first measured baseline traction (pre-agonist) stress

99 exerted by these isolated cells on the substrate to confirm that the baseline traction was  
100 significantly higher in isolated cells cultured on stiff, with a mean traction stress of  
101  $15.95 \pm 5.02$  Pa (N=21), versus isolated cells cultured on soft substrates, with a mean traction  
102 stress of  $6.98 \pm 1.68$  Pa (N=16). The corresponding median stresses were 6.89 Pa on soft  
103 matrix and 16.00 Pa on stiff substrate (Mann-Whitney Rank Sum test,  $P < 0.001$ ). We then  
104 exposed these isolated SMCs to  $10^{-5}$  M histamine and measured the time period of  $\text{Ca}^{2+}$   
105 oscillations. Contrary to our expectations, ECM stiffness had no impact on the  $\text{Ca}^{2+}$  response  
106 of isolated SMCs to  $10^{-5}$  M histamine (Fig. 1F). Cells cultured on the soft substrate had a  
107 mean period of  $66.11 \pm 10.55$  seconds (N=14) and those on the stiff matrix had a mean period  
108 of  $65.73 \pm 11.48$  seconds (N=12), which was not statistically significantly different (t-test,  
109  $P = 0.930$ ). Therefore, despite the higher levels of prestress in individual cells, ECM  
110 stiffening has no impact on the agonist-induced  $\text{Ca}^{2+}$  frequency of isolated cells.

111 SMCs sense matrix as a collective and alter their  $\text{Ca}^{2+}$  response to agonist: To probe this  
112 phenomenon further, starting with the isolated SMCs (Fig. 1B), we increased the seeding  
113 density (Fig. 1C, S1C) until we had a confluent cluster of SMCs (Fig. 1D, S1D). At each  
114 seeding density, we measured the time period of  $\text{Ca}^{2+}$  oscillations for SMCs adhering to soft  
115 ( $E = 0.3$  kPa) and stiff ( $E = 13$  kPa) substrates in response to  $10^{-5}$  M histamine (Fig. 1F-1H).  
116 Sparsely seeded cells (Fig. 1G) responded similarly to isolated cells (Fig. 1F), exhibiting no  
117 statistically significant difference between the agonist-induced  $\text{Ca}^{2+}$  oscillations on soft and  
118 stiff matrix (t-test,  $P = 0.481$ ). The mean time period of oscillations of sparse SMCs on the  
119 soft substrate was  $51.74 \pm 8.11$  seconds (N=4) and  $55.63 \pm 6.48$  seconds (N=4) on the stiff  
120 substrate (Fig. 1G). Confluent cells behaved like those patterned in a ring, with cells plated  
121 on stiffer substrate exhibiting a significantly higher frequency of  $\text{Ca}^{2+}$  oscillations in  
122 response to  $10^{-5}$  M histamine. Confluent SMCs on soft matrix had a mean time period of  
123  $58.36 \pm 5.89$  seconds (N=5), and the same healthy, confluent cells on stiff matrix had a mean

124 period of  $35.03 \pm 1.03$  seconds ( $N=7$ , Fig. 1H). The corresponding median time periods were  
125 58.87 seconds on soft matrix and 35.11 seconds on stiff matrix (Mann-Whitney Rank Sum  
126 Test,  $P=0.003$ ). These results suggest the existence of a collective phenomenon in smooth  
127 muscle cells, where clusters of confluent SMCs alter their agonist-induced  $\text{Ca}^{2+}$  oscillations  
128 in response to changes in matrix stiffness while isolated cells do not. In the supplementary  
129 information (Fig. S2), we include additional measurements made on two intermediate  
130 stiffnesses,  $E=0.6$  kPa,  $E=3$  kPa, and glass ( $E \rightarrow \infty$ ). These experiments confirm that  $\text{Ca}^{2+}$   
131 oscillations resulting from exposure to  $10^{-5}$  M histamine are unaffected by ECM stiffness in  
132 isolated SMCs, whereas in confluent cells, the same dose of agonist can evoke a  
133 significantly different  $\text{Ca}^{2+}$  response in SMCs depending on the stiffness of the underlying  
134 matrix. This finding is extremely significant in all smooth muscle pathologies because all  
135 downstream  $\text{Ca}^{2+}$  dependent molecular processes rely on  $\text{Ca}^{2+}$  oscillations to perceive the  
136 external concentration of contractile agonist detected by the G-protein coupled receptors on  
137 the cell surface. Here we show that the combination of confluence and ECM stiffness can  
138 alter how cells perceive contractile agonist.

## 139 **2. Matrix stiffening synchronizes $\text{Ca}^{2+}$ oscillations within a multicellular SMC cluster.**

140 We next explored the nature of intercellular communication underlying the collective  
141 agonist-induced  $\text{Ca}^{2+}$  response in SMCs. To do this, we first analyzed the time series of  
142 histamine-induced  $\text{Ca}^{2+}$  oscillations for signs of interactions among the different SMCs  
143 within a confluent cluster. After correcting for drift due to photobleaching of the  
144 fluorophore, we calculated the cross-correlation coefficient ( $\rho_{i,j} \in [-1,1]$ ) of the  $\text{Ca}^{2+}$   
145 oscillations occurring in the  $i^{\text{th}}$  cell and the  $j^{\text{th}}$  cell in the cluster for all the cells in a cluster.  
146 The measured values of  $\rho_{i,j}$  in a typical SMC cluster is depicted in Fig. 2A as a representative  
147  $24 \times 24$  matrix, with the extreme values  $\rho_{i,j} \rightarrow 1$  (pink) indicating that the  $\text{Ca}^{2+}$  levels in the

148  $i^{\text{th}}$  and  $j^{\text{th}}$  cell rise and fall perfectly in sync with each other (perfectly correlated) (Fig. 2B),  
149  $\rho_{i,j} \rightarrow -1$  (green) indicating that when the  $\text{Ca}^{2+}$  levels in  $i^{\text{th}}$  cell rises, the  $\text{Ca}^{2+}$  levels in the  $j^{\text{th}}$   
150 cell falls and vice-versa (anti-correlated),  $\rho_{i,j} \rightarrow 0$  (white) indicating no correlation in the  
151  $\text{Ca}^{2+}$  oscillations occurring in  $i^{\text{th}}$  and  $j^{\text{th}}$  cells (Fig. 2B). To avoid the effects of histamine  
152 diffusion, the first 60 seconds immediately after application of histamine was not considered  
153 in the correlation calculation. Histograms of  $\rho_{i,j}$  measured in isolated SMCs and confluent  
154 clusters of SMCs cultured on soft and stiff matrices are shown in Figs. 2C and 2D,  
155 respectively. Isolated SMCs (Fig. 2C), did not exhibit correlated  $\text{Ca}^{2+}$  oscillations, with a  
156 mean  $\rho$  of zero, regardless of whether they were cultured on soft ( $0.01 \pm 0.06$ ,  $N=5$ ) or stiff  
157 ( $0.03 \pm 0.06$ ,  $N=4$ ) substrates. However, for cells in a confluent cluster, matrix stiffening  
158 caused a statistically significant shift in  $\rho$  towards positive correlation (Fig. 2D). The mean  
159  $\rho$  for confluent clusters on soft matrices was  $0.03 \pm 0.04$ ,  $N=4$ , versus on stiff matrices,  $\rho$   
160 increased to  $0.26 \pm 0.10$ ,  $N=5$ . A two-way ANOVA test with confluence and ECM stiffness  
161 as independent factors showed a significant interaction between confluence and ECM  
162 stiffness ( $P=0.007$ ). Post-hoc pairwise comparisons using the Holm-Sidak test showed a  
163 significant difference in the pairwise correlations in confluent clusters due to ECM stiffness  
164 ( $P<0.001$ ). In the isolated cells, there was no statistical difference in the pairwise  
165 correlations due to ECM stiffness ( $P=0.733$ ). We also did not observe any systematic  
166 relationship between the pairwise correlation in  $\text{Ca}^{2+}$  oscillations and the distance between  
167 the SMCs.

168 Next, we investigated the time it takes after the addition of histamine for the  $\text{Ca}^{2+}$   
169 oscillations to synchronize. In order to do this, we repeated the previous calculation of cross-  
170 correlations, but instead of using the entire time series, we used a time window of 120  
171 seconds starting at  $t=60$  seconds after addition of histamine and repeated the  $\rho_{i,j}$  calculation  
172 for the  $\text{Ca}^{2+}$  time series within this 120 seconds window for all cells in the cluster. The time

173 window was then shifted in increments of 15 seconds over the rest of the 5-minute time  
174 frame over which we measured  $\text{Ca}^{2+}$  oscillations. Shown in Fig. 2E and Fig. 2F are the  
175 average through time,  $\rho_{i,j}(\tau)$  of cross-correlation coefficients between all cells either isolated  
176 or confluent, soft and stiff matrix, respectively. A two-way ANOVA with time after addition  
177 of histamine and ECM stiffness as the two independent factors shows no difference due to  
178 stiffness ( $P=0.303$ ) or time ( $P=0.274$ ) in isolated cells. However, in confluent cells on stiff  
179 ECM, the correlation coefficients gradually increase over time, for about 1 minute, which  
180 matches the time course for force generation in airway SMCs (17). In conjunction with our  
181 findings from the previous section, these results demonstrate that not only does the  
182 combination of a stiff matrix and confluent clusters of cells lead to faster  $\text{Ca}^{2+}$  oscillations,  
183 but it also causes histamine-induced  $\text{Ca}^{2+}$  oscillations to synchronize across the cells in the  
184 cluster.

### 185 **3. Gap junctions do not play a role in regulating the collective $\text{Ca}^{2+}$ response of SMC** 186 **clusters.**

187 The most well studied long-range communication mechanism in multicellular systems is  
188 the intercellular waves of  $\text{Ca}^{2+}$  that are capable of propagating over distances much longer  
189 than a cell length through a regenerative  $\text{Ca}^{2+}$  induced  $\text{Ca}^{2+}$  release mechanism (18). This  
190 mode of communication is mediated through two critical pathways: (i) gap junction  
191 channels, which connect the cytoplasm of neighboring cells and allow for the transport of  
192 signaling molecules from one cell to its neighbor and (ii) extracellular diffusion of a  
193 signaling molecule like ATP, which can diffuse and bind to purinergic receptors on  
194 neighboring cells, causing  $\text{Ca}^{2+}$  release in these cells (19).

195 Transport through gap junctions is unaffected by ECM stiffness: We first fluorescently  
196 labeled gap junctions by staining for connexin-43 (Cx43). The expression of Cx43 (red) for



197 confluent clusters of SMCs on soft and stiff substrates are shown in Figs. 3A and 3B,  
198 respectively. The actin filaments (green) and the nucleus (blue) are also labeled. From these  
199 images, we quantified the number of gap junctions per cell for confluent cells plated on soft  
200 and stiff substrates. There was no significant difference between Cx43 expression on soft  
201 and stiff substrates from N=5 independent samples per stiffness, each containing<sup>(1)</sup>  
202 approximately 35 cell measurements (t-test, P=0.977) (Fig. 3C). Next, we tested whether  
203 ECM stiffness induced a change in the efficiency of transport through gap junctions. To this  
204 end, we employed a commonly used technique to quantitatively assess the efficiency of  
205 transport through gap junctions called gap-FRAP (20). Briefly, a confluent layer of SMCs  
206 was incubated with membrane-permeable calcein-AM. Upon entering the cell, the acetyl  
207 methyl ester bond was hydrolyzed by intracellular esterases, trapping the hydrophilic  
208 calcein molecule within the cell (Fig. 3D, column 1). The calcein in one cell selected at  
209 random was then bleached using a high-intensity laser (Fig. 3D, column 2). The bleached  
210 calcein molecules and the unbleached calcein molecules in neighboring cells diffuse  
211 through gap junctions leading to a recovery in fluorescence (Fig. 3D, column 3). The  
212 kinetics and extent of recovery in fluorescence in the bleached cell reflects the efficiency of  
213 transport across gap junctions via diffusion. A typical recovery curve is shown in Fig. 3E,  
214 where  $F_0, F_b, F_r$  indicate the fluorescence intensity in the target cell at baseline, after  
215 bleaching and after recovery. To quantify the extent of recovery, we calculated the mobile  
216 fraction,  $\Gamma$ , given by

$$\Gamma = \frac{F_r - F_b}{F_0 - F_b} \times 100\%$$

218 for confluent SMCs cultured on soft and stiff matrices (N=16, N=18 independent trials,  
219 respectively). We found no difference in the mobile fraction due to ECM stiffness. SMCs  
220 on soft matrix had a mean mobile fraction,  $\Gamma$  of  $42.19 \pm 10.50\%$ , and those on stiff matrix

221 had a  $\Gamma$  of  $40.05 \pm 9.18\%$  (t-test,  $P=0.532$ ) (Fig. 3F). We also did not observe any statistically  
222 significant difference in the rate of recovery in fluorescence  $k_r$ , which was calculated by  
223 fitting an exponential function  $F(t) = F_b + F_r(1 - e^{-k_r t})$  to the recovery curve. On soft ECM,  
224  $k_r$  was  $0.01 \pm 0.02$  (N=16) and on stiff ECM,  $k_r$  was  $0.01 \pm 0.05$  (N=18). There was no  
225 statistical difference in the rate of recovery due to ECM stiffness (t-test,  $P=0.55$ ).

226 Blocking gap junctions does not affect agonist-induced  $\text{Ca}^{2+}$  oscillations: To further explore  
227 the role of gap junctions in the collective response of the SMCs to agonist, we used  $30 \mu\text{M}$   
228 of  $\beta$ -glycyrrhetic acid ( $\beta\text{GA}$ ) to block transport across gap junctions.  $\beta\text{GA}$  causes  
229 dephosphorylation of connexins and disassembly of gap junctions (21). We first used gap-  
230 FRAP to verify that a  $30 \mu\text{M}$  dose of  $\beta\text{GA}$  was sufficient to completely block transport  
231 across gap junctions. The mobile fraction,  $\Gamma$ , measured in a confluent layer of SMCs after  
232 application of  $30 \mu\text{M}$   $\beta\text{GA}$  dropped significantly from a mean of  $40.05 \pm 9.18\%$  to  
233  $6.84 \pm 2.89\%$  (N=18, with corresponding medians  $40.41\%$  and  $7.02\%$ , respectively, Mann-  
234 Whitney Rank Sum Test,  $P < 0.001$ ) (Fig. 3F). This recovery is similar to the  $7.89\%$  recovery  
235 we measured in an isolated cell. Similar minimal recovery has been noted in the literature  
236 (22), indicating that transport across gap junctions was blocked. After 30 minutes of  
237 incubation with  $30 \mu\text{M}$  dose of  $\beta\text{GA}$ , we measured histamine-induced  $\text{Ca}^{2+}$  oscillations in  
238 confluent clusters of SMCs. Much to our surprise, we found that blocking gap junctional  
239 transport had no impact on the histamine-induced  $\text{Ca}^{2+}$  oscillation periods in multicellular  
240 clusters of SMCs, regardless of the stiffness of the ECM (N=6 soft, N=4 stiff) (Fig. 3G). A  
241 two-way ANOVA with treatment ( $\beta\text{GA}$ ) and ECM stiffness as the two independent factors  
242 showed no difference in the time period of histamine-induced  $\text{Ca}^{2+}$  oscillations due to  
243 treatment ( $P=0.784$ ) for a given stiffness. Post-hoc pairwise comparisons with the Holm-  
244 Sidak method showed the  $\text{Ca}^{2+}$  oscillations remained significantly faster on the stiff matrix  
245 ( $P < 0.001$ ) even after blocking gap junctions.

#### **4. Mechanical force transfer among cells regulates the collective Ca<sup>2+</sup> response of SMC clusters.**

Ca<sup>2+</sup> wave propagation follows the contractile axis of the SMCs: Next, we considered extracellular diffusion of signaling molecules, such as ATP, as a possible mode of intercellular communication that enables the collective Ca<sup>2+</sup> response of SMC clusters on stiff matrices (18). In order to do this, we measured the direction in which the Ca<sup>2+</sup> wave propagates from one cell to the next in SMC clusters cultured on stiff substrates. If we select a cell in an SMC cluster, a wave that passes through it will appear as a localized increase in Ca<sup>2+</sup> in the cell which is followed by a localized increase in Ca<sup>2+</sup> in one of its neighbors. We reasoned that if the intercellular Ca<sup>2+</sup> transport was being enabled by extracellular diffusion of signaling molecules, then the resulting Ca<sup>2+</sup> wave should have an equal chance of moving in all directions (isotropic). We split the direction of propagation of the Ca<sup>2+</sup> wave from an SMC into two directions: a direction parallel to the contractile axis of the SMC, and a direction perpendicular to the contractile axis of the SMC. For the cell labeled 1 shown in Fig. 4A (insets), cells 2 and 4 were considered parallel to cell 1's contractile axis and cells 3 and 5 were considered perpendicular to cell 1's contractile axis. We calculated the conditional probability for a localized increase in Ca<sup>2+</sup> in one cell to be followed by a localized increase in a parallel neighbor versus its perpendicular neighbor. This conditional probability quantifies the isotropy in Ca<sup>2+</sup> wave propagation with respect to the contractile axis of the SMC, with equal probability (0.5) in parallel and perpendicular direction indicating isotropy in Ca<sup>2+</sup> wave propagation. Instead, we found that there was an 80.5±7.53% chance for the Ca<sup>2+</sup> wave to follow the contractile axis of the SMC (Fig. 4B, N=10, t-test, P<0.001). The high probability of the Ca<sup>2+</sup> wave to follow the contractile axis of the SMCs rules out extracellular diffusion as the dominant mechanism for intercellular communication in our experiments.

271 Mechanical force transfer between SMCs regulates their  $\text{Ca}^{2+}$  response: Thus far, we have  
272 ruled out transport through gap junctions and extracellular diffusion, the two widely  
273 accepted mechanisms responsible for intercellular communication in confluent cell clusters  
274 using  $\text{Ca}^{2+}$  waves (18). The propensity of  $\text{Ca}^{2+}$  waves to follow the direction of the  
275 contractile axis of the SMC suggested force transfer between neighboring SMCs as a  
276 potential mechanism that regulates the collective  $\text{Ca}^{2+}$  response of SMC clusters. To  
277 quantify SMC forces in our confluent clusters, we used Fourier transform traction force  
278 microscopy (23) to measure the traction stress generated by cells exposed to  $10^{-5}$  M  
279 histamine. Traction stress is the force exerted by the cell normalized by the cross-sectional  
280 area over which the force acts. Before agonist stimulation, mean traction stresses for isolated  
281 cells were  $6.98 \pm 1.68$  Pa on soft (N=16) and  $15.95 \pm 5.02$  Pa on stiff (N=21) substrates, and  
282  $13.56 \pm 1.56$  Pa on soft (N=12) and  $14.26 \pm 1.89$  Pa on stiff (N=21) for confluent cells. We  
283 found that histamine had generated a normalized traction (post-histamine traction stress/pre-  
284 histamine traction stress) of  $1.22 \pm 0.11$  in confluent cells on soft substrates (N=12). On  
285 stiffer matrix, a confluent cluster of SMCs from the same healthy donor and passage  
286 generated normalized force of  $2.24 \pm 0.26$  (N=21) (Fig. 4C). There was a statistically  
287 significant difference ( $P < 0.001$ , t-test) between the force generated on soft and stiff  
288 substrates in response to the same dose of agonist. To test the possibility that higher force  
289 transfer among cells on stiff substrates was responsible for this collective phenomenon, we  
290 experimentally measured the effect of reducing muscle force on  $\text{Ca}^{2+}$  oscillations with two  
291 independent inhibitors of force generation: (1) Rho-associated kinase (ROCK) inhibitor, Y-  
292 27632, which reduces SMC force by inhibiting myosin light chain phosphorylation and by  
293 removing the inhibitory effect of ROCK on the activity of myosin light chain phosphatase  
294 and (2) myosin light chain kinase (MLCK) inhibitor, ML-7, which reduces force by  
295 inhibiting myosin light chain phosphorylation. Confluent SMC clusters on  $E=13$  kPa matrix

296 were pre-treated with increasing doses of either Y-27632 for 1 hour prior to histamine  
297 exposure or increasing doses of ML-7 for 5 minutes prior to histamine exposure (Fig. 4D).  
298 We found that increasing the concentration of Y-27632 from 10  $\mu$ M (N=3) to 100  $\mu$ M (N=4)  
299 abolished the stiffness-induced reduction in time period of  $Ca^{2+}$  oscillations in a dose-  
300 dependent manner (One-Way ANOVA with treatment as the independent variable,  
301  $P<0.001$ ). Similarly, increasing the dose of ML-7 from 0.01  $\mu$ M to 0.05  $\mu$ M also abolished  
302 the stiffness-induced reduction in time period of  $Ca^{2+}$  oscillations in a dose-dependent  
303 manner (One-Way ANOVA,  $P<0.001$ ). With both these inhibitors, the higher concentration  
304 resulted in histamine-induced  $Ca^{2+}$  oscillation periods on stiff matrices that were not  
305 statistically different from the histamine-induced  $Ca^{2+}$  oscillation periods on soft matrices.  
306 These results clearly demonstrate that the exaggerated histamine-induced  $Ca^{2+}$  response due  
307 to matrix stiffening can be *systematically*, and *completely* abrogated by reducing mechanical  
308 forces in the multicellular ensemble.

### 309 **5. Confining the SMCs to a line reduces the variability in $Ca^{2+}$ oscillation periods:**

310 Comparing the alignment of SMCs in Fig. 1B to Fig. 1D and Fig. 4A, we observed that with  
311 the onset of confluence, SMCs naturally tend to organize themselves into spatial clusters of  
312 aligned cells. To test the effect of SMC alignment on the higher frequency of  $Ca^{2+}$   
313 oscillation on stiff substrates, we compared the time period of  $Ca^{2+}$  oscillations in confluent  
314 SMC clusters to the time period of  $Ca^{2+}$  oscillations in SMC clusters micropatterned in a  
315 line which was 1000  $\mu$ m long and 15  $\mu$ m wide (~1 cell wide and ~10 cell lengths long) (Fig.  
316 5A, S1E). The idea here was to eliminate the possibility of intercellular communication  
317 occurring perpendicular to the contractile axis in confluent clusters; through mechanisms  
318 that are less likely to be influenced by force. We found that while the mean time period of  
319 oscillations was nearly identical in both confluent SMC clusters and lines of SMCs, the

320 probability of cells with a higher time period of  $\text{Ca}^{2+}$  oscillations decreases when SMCs are  
321 aligned (Fig. 5B). An F-test shows a significant decrease in the variability of the time period  
322 distribution when the cells are aligned in a line (N=8 soft, N=6 stiff,  $P < 0.001$ ). This result  
323 is consistent with the idea that higher  $\text{Ca}^{2+}$  frequencies are being driven by force transfer  
324 along the contractile axis.

325 The effect of localized ECM stiffening can be sensed by SMCs over long distances: ECM

326 remodeling in airways and blood vessels often occur as spatially localized processes. How  
327 does this pathological change in the ECM spread? Current theories require cells to migrate  
328 into the region of stiffer ECM for them to sense the altered matrix and respond by excessive  
329 secretion of matrix proteins thereby creating a positive feedback loop that leads to more  
330 ECM remodeling (24). However, given the collective nature of ECM stiffness sensing in  
331 SMC clusters, it may be possible for SMCs located far away from the site of ECM  
332 remodeling to detect this localized change, even though these SMCs are not physically in  
333 contact with the stiff ECM. To test this hypothesis and to quantify the distance over which  
334 a localized increase in ECM stiffness would be felt by an ensemble of SMCs, we created a  
335 dual-stiffness substrate (Fig. 5C), where the region marked in green has Young's modulus  
336 of 13 kPa and the region in black has Young's modulus of 0.3 kPa. We then patterned SMCs  
337 in a line starting from the stiff region and extending into the soft region. Cells on soft and  
338 stiff ECM were simultaneously exposed to  $10^{-5}$  M histamine, and we measured the time  
339 period of  $\text{Ca}^{2+}$  oscillations in SMCs on the soft ECM for 5 minutes. The change in  $\text{Ca}^{2+}$   
340 oscillation time period was not sudden as one moved from the stiff to the soft ECM (Fig.  
341 5D). Rather, the mean time period increased at a slow rate of 1.83 s/100  $\mu\text{m}$ . We grouped  
342 the cells by distance from the edge into 400  $\mu\text{m}$  bins and statistically tested the difference  
343 in the time period of  $\text{Ca}^{2+}$  oscillations between each bin and cells in physical contact with  
344 the stiff substrate. We found that there was no statistically significant difference between

345 histamine-induced  $\text{Ca}^{2+}$  oscillations for cells on stiff substrates and cells up to 800  $\mu\text{m}$   
346 (approximately 8 cell lengths) away from the edge (N=4, Mann-Whitney Rank Sum Test,  
347 P=0.140). Cells beyond 800  $\mu\text{m}$  had significantly different time periods (N=4, t-test,  
348 P<0.001). This result demonstrates that spatially localized alterations in the ECM can be  
349 detected by SMCs far from the site of ECM remodeling, suggesting that ECM pathology  
350 can spread through the organ much faster than currently believed.

## 351 Discussion

352 Increased stiffness of the extracellular matrix (ECM) that surrounds and supports cells in  
353 tissue is associated with a number of disease conditions ranging from cancer and fibrosis  
354 (25) to cardiovascular (26), lung (1), eye (27), and age-related diseases (28). Traditionally,  
355 pathological alterations in the ECM were thought to be the consequence of disease  
356 progression. However, it is now becoming increasingly apparent in many diseases that  
357 matrix stiffening precedes disease development and could, therefore, contribute to disease  
358 progression (5, 29). Recognizing the importance of ECM remodeling, clinical trials were  
359 undertaken to restore the healthy, homeostatic state of the ECM (30). These early efforts  
360 were unsuccessful (31) and attention has now turned to understanding and targeting the  
361 mechanisms by which cells perceive and respond to changes in the ECM (29).

362 Here, we demonstrate a collective phenomenon in smooth muscle cells (SMC) in which  
363 matrix stiffness alters the intercellular communication between cells in an ensemble  
364 resulting in elevated contractility at low doses of agonist. We show that this collective  
365 mechanosensing phenomenon is enabled by crosstalk among cells using  $\text{Ca}^{2+}$  waves (18). A  
366 common mechanism of communication involves the molecular transport of  $\text{Ca}^{2+}$  and  
367 inositol trisphosphate ( $\text{IP}_3$ ) across gap junctions. However, our measurements showed no  
368 tendency for molecular transport through gap junctions to differ depending on ECM

369 stiffness. We blocked transport through gap junctions using 18  $\beta$ -glycyrrhetic acid ( $\beta$ GA)  
370 (32) and confirmed that the dose we used was sufficient to completely disrupt molecular  
371 transport across gap junctions. Contrary to our expectations based on current models (18),  
372 blocking transport through gap junctions had no impact on the collective agonist response  
373 of SMCs to ECM stiffening. There was no change in the  $\text{Ca}^{2+}$  oscillation for SMCs on soft  
374 and stiff substrates after  $\beta$ GA treatment. Following a recent finding that mechanical forces  
375 can synchronize contraction of cardiac myocytes in the developing heart independent of gap  
376 junctions (32), we tested whether ECM stiffening led to a switch in the mode of  
377 communication between cells from molecular signaling through gap junctions to  
378 mechanical force based signaling.

379  $\text{Ca}^{2+}$  waves can travel distances far greater than a cell length because  $\text{Ca}^{2+}$  waves regenerate  
380 in each cell by “calcium-induced calcium release” from the endoplasmic reticulum (ER). In  
381 the most widely accepted theory of long-range  $\text{Ca}^{2+}$  transport,  $\text{Ca}^{2+}$  release from the ER is  
382 enabled by a messenger molecule,  $\text{IP}_3$ , which diffuses faster than  $\text{Ca}^{2+}$  and activates the  
383 receptors on the ER, so when the  $\text{Ca}^{2+}$  wave arrives, it can release more  $\text{Ca}^{2+}$ . This theory  
384 had its basis in measurements of  $\text{IP}_3$  diffusivity in the *Xenopus* extract model of the  
385 cytoplasm (33), which put the diffusivity of  $\text{IP}_3$  at  $400 \mu\text{m}^2/\text{s}$  and that of  $\text{Ca}^{2+}$  at  $40 \mu\text{m}^2/\text{s}$ .  
386 However, more recent measurements made in human cells show that  $\text{IP}_3$  diffuses at a slower  
387 rate than  $\text{Ca}^{2+}$  (34). Our finding that molecular diffusion through gap junctions is not  
388 necessary to sustain  $\text{Ca}^{2+}$  waves in SMC clusters is consistent with the challenge to the  
389 dogma of  $\text{Ca}^{2+}$  wave propagation through gap junctions.

390 In contrast to  $\text{Ca}^{2+}$  wave propagation in other cell types, measurements in confluent SMC  
391 clusters (Fig. 4A,B) show that  $\text{Ca}^{2+}$  waves follow the direction of the contractile axis of the  
392 SMCs. Further, reducing the SMC force in our experiments with two independently-acting



393 muscle relaxants slowed the  $\text{Ca}^{2+}$  oscillations and intercellular  $\text{Ca}^{2+}$  waves (Fig. 4D),  
394 suggesting that mechanical force transfer from one cell to its neighbor enables the  
395 intercellular  $\text{Ca}^{2+}$  transport. Can force transfer between cells also serve as a mechanism that  
396 amplifies and modulates the frequency of oscillations as the  $\text{Ca}^{2+}$  wave moves from cell-to-  
397 cell? The mechanisms that underlie the findings of the present study can be understood in  
398 light of previous work from Felix et al (35) and Tanaka et al (36) who show that forces  
399 applied to a cell membrane cause  $\text{PIP}_2$  to be hydrolyzed resulting in an increase in cytosolic  
400  $\text{IP}_3$  concentration. This would mean that for every SMC cell within a confluent cluster, there  
401 are two ways by which  $\text{IP}_3$  can be released into the cytosol: (i) from agonist binding to  
402 GPCR receptors on the cell surface. (ii) from  $\text{IP}_3$  generated by a contracting SMC pulling  
403 on its neighbor causing  $\text{IP}_3$  release in the neighboring cell (35, 36). This *additional* method  
404 of  $\text{IP}_3$  release only exists for cells in a confluent cluster. Further, we have previously shown  
405 that force transfer between SMCs increases 8-fold with matrix stiffening (12). Such a force-  
406 based  $\text{IP}_3$  release mechanism can explain how SMC clusters alter their agonist-induced  $\text{Ca}^{2+}$   
407 oscillations in a matrix stiffness-dependent manner while isolated cells, which lack the  
408 second source of  $\text{IP}_3$ , do not.

409 Dysfunction in the smooth muscle has long been thought to be responsible for the  
410 exaggerated narrowing of transport organs like as asthma, hypertension and Crohn's  
411 disease. Asthma is an example of a disease where remodeling of the ECM is well  
412 characterized (1), but its effects are not considered in therapy or drug development.  
413 Asthmatics can be free of inflammation, and have spirometry and respiratory mechanics  
414 within the range of healthy individuals, up until they are exposed to a smooth muscle agonist  
415 at which point airways in an asthmatic will hyper-constrict (37). This exaggerated response  
416 of the airway is currently thought to result from the sensitization of force-generating  
417 pathways in the SMC due to prolonged exposure to inflammatory agents. Here, we

418 demonstrate that the fault may instead lie in changes in ECM stiffness that can regulate how  
419 smooth muscle cells perceive agonist dose. To assess the overall magnitude and potential  
420 physiological impact of the observed effect, we measured the  $\text{Ca}^{2+}$  response to different  
421 doses of histamine at two different stiffnesses (Fig. S3). The data shows that if the ECM  
422 stiffness of small airways (inner diameter < 3 mm) in a healthy human lung with  $E=0.3$  kPa  
423 (*12*) were to remodel and become stiff ( $E=13$  kPa), healthy airway SMCs would now  
424 responds to a dose of  $10^{-5}$  M histamine as though they received  $10^{-3}$  M histamine (two log  
425 dose higher concentration). We also demonstrate that the corresponding agonist-induced  
426 force is also substantially higher (Fig. 4C).

427 There are several confounding factors to consider as one extrapolates these findings at the  
428 length scale of cells to the length scale of the airway/lung. These confounding factors  
429 include, but are not limited to (i) connectivity among smooth muscle cells within the airway:  
430 to constrict an airway, SM cells need to connect with each other to form a percolating force  
431 transfer path that winds around the circumference of the airway, and generates a force  
432 sufficient to narrow the airway lumen. These physical connections between cells can occur  
433 through direct cell-cell (cadherin-based contacts) or cell-ECM (focal adhesion) connections,  
434 which are in turn dependent on mechanical forces (*12*). (ii) Transmural pressure: the  
435 mechanical load presented by the ECM which will vary depending on the size of the airway  
436 and the transmural pressure. (iii) Additional confounding factors: surface tension, airway  
437 tone, parenchymal tethering forces, etc. will also play a role in dictating the degree to which  
438 airway lumen narrows in response to smooth muscle activation by inhaled agonist.  
439 Experimentally validating these results in lung tissue will require the development of new  
440 technology to alter ECM stiffness of airways. With careful calibration, it might be possible  
441 to adapt methods from tissue engineering like UV-induced crosslinking of collagen to study  
442 the effects of ECM stiffening *in situ* in precision-cut lung slices.

443 At first glance, it appears contradictory that stretch decreases airway smooth muscle force  
444 (38). Yet, stretch has also been shown to trigger a rise in cytosolic  $\text{Ca}^{2+}$  (39). The key to this  
445 apparent paradox may be found in the single stretch experiments of Krishnan et al (40) as  
446 well as computational models of the effect of stretch on muscle force (15). These studies  
447 show that the decline in force occurs almost instantly upon stretching and is related to  
448 rupture events in the cytoskeleton. The recovery, however, is slow and occurs at a timescale  
449 of the order of 100s in human smooth muscle. When a cell is being subjected to cyclic  
450 stretch (such as the length oscillations), the cell is attempting to recover its original prestress  
451 which it lost immediately after the onset of stretch. To regain prestress, myosin activity is  
452 required, and this necessitates higher  $\text{Ca}^{2+}$  levels.

453 ECM remodeling in airways and blood vessels often occur as spatially localized processes.  
454 We also show that a spatially localized change in the ECM might be sufficient for  
455 exaggerated force generation in SMCs far away from the site of ECM remodeling.  
456 Consequently, the effects of ECM remodeling may manifest much earlier in disease  
457 progression than currently believed. Our findings are relevant to discovering new pathways  
458 by which ECM remodeling can be the primary driver of disease and for ongoing efforts to  
459 develop new drugs that target mechanosensory pathways (29). For airway smooth muscle,  
460 and asthma, in particular, these results show that the current treatment regimen may need to  
461 shift to new paradigms that target matrix remodeling and mechanosensory pathways for a  
462 more lasting cure.

## 463 **Materials and Methods**

464 **Fabrication of optically clear substrates of tunable stiffness:** NuSil is an optically clear,  
465 biologically inert PDMS substrate with Young's Modulus tunable in the range from 0.3 kPa  
466 to 70 kPa (11). Equal parts of NuSil gel-8100 parts A and B (NuSil, Carpinteria, CA, USA)

467 were mixed with various amounts of the crosslinking compound of Sylgard 184 (Dow  
468 Corning, Midland, MI, USA) to adjust substrate stiffness. A crosslinker volume 0.36% of  
469 the combined parts A and B volume was added for substrates with Young's modulus  $E = 13$   
470 kPa, and no crosslinker was added to the 1:1 A:B mixture for substrates with Young's  
471 modulus  $E = 0.3$  kPa. After mixing, the substrate was spin coated onto 30 mm diameter, #1.5  
472 glass coverslips for 50 seconds to produce a 100  $\mu\text{m}$ -thick layer. They settled on a level  
473 surface at room temperature for 1 hour before curing at 60° C overnight. These cured  
474 substrates on coverslips were secured in sterile 40 mm Biotech dishes (Biological Optical  
475 Technologies, Butler, PA, USA) to be used for cell culture.

476 **Matrix protein coating:** In order to coat the entire silicone substrate with protein, a volume  
477 of 0.1% gelatin solution was added and incubated at room temperature in the biosafety  
478 cabinet for 1 hour. To create protein patterns, we utilized the Alvéole's PRIMO optical  
479 module and the Leonardo software, a UV-based, contactless photopatterning system  
480 (Alvéole, Paris, France). The substrate surface was first coated with 500  $\mu\text{g}/\text{mL}$  PLL (Sigma  
481 Aldrich, St. Louis, MO, USA) for 1 hour at room temperature. The substrate was washed  
482 with PBS and 10 mM HEPES buffer adjusted to pH 8.0, and then incubated with 50  $\text{mg}/\text{mL}$   
483 mPEG-SVA (Laysan Bio, Inc., Arab, AL, USA) at room temperature for 1 hour, and washed  
484 with PBS once more. The PRIMO system was calibrated using fluorescent highlighter on  
485 an identical substrate. The PBS was replaced by 14.5  $\text{mg}/\text{mL}$  PLPP (Alvéole, Paris, France),  
486 and then the desired pattern, previously created with graphic software, was illuminated with  
487 UV light focused on the substrate surface for 30 seconds. Patterned surfaces were washed  
488 again with PBS and then incubated with 0.1% gelatin for 1 hour at room temperature. The  
489 substrate was washed and maintained hydrated in PBS at 4° C overnight.

490 **Human airway smooth muscle cell culture:** Primary human airway smooth muscle cells  
491 (SMCs) were acquired through the Gift of Hope foundation (via Dr. Julian Solway, M.D.,

492 University of Chicago) and through ATCC (<https://www.atcc.org>). Both these sources are  
493 public and pertinent medical information about the donor was relayed to us, but all donor  
494 identifiers are removed. The donor remains anonymous and cannot be identified directly or  
495 through identifiers linked to the subjects, meeting NIH guidelines. In this study, we used 4  
496 healthy human donors with no history of asthma: 2 male, ages 59 and 34, and 2 female, ages  
497 18 and 82. This study was carried out in accordance with the guidelines and regulations  
498 approved by the Institutional Biosafety Committee at Northeastern University. Cells were  
499 grown under standard culture conditions of 37° C and 5% CO<sub>2</sub> and utilized by P6 for all  
500 experiments. Culture medium: Cells were cultured in 10% fetal bovine serum, DMEM/F12  
501 (Fisher Scientific), 1x penicillin/streptomycin (Fisher Scientific), 1x MEM non-essential  
502 amino acid solution (Sigma Aldrich), and 25 µg/L Amphotericin B (Sigma Aldrich). Prior  
503 to any measurements, the growth medium was switched to serum-free media for at least 24  
504 hours. The serum-free medium was comprised of Ham's F-12 media (Sigma Aldrich), 1x  
505 penicillin/streptomycin, 50 µg/L Amphotericin B, 1x glutamine (Fisher Scientific), 1.7 mM  
506 CaCl<sub>2</sub> 2H<sub>2</sub>O, 1x Insulin-Transferrin-Selenium Growth Supplement (Corning Life Sciences;  
507 Tewksbury, MA), and 12 mM NaOH. Both patterned and non-patterned gelatin-coated  
508 substrates were UV sterilized for 1 hour, then incubated at 37° C for 1 hour before seeding  
509 human airway SMCs, passage 3-6. For patterned substrates, cells were seeded in Biotech  
510 dishes at 10<sup>4</sup> cells per cm<sup>2</sup> and incubated for 10 minutes in 10% serum media to allow cells  
511 to adhere to patterns. Next, the dishes were washed with PBS to remove excess cells, and  
512 then filled with 10% serum media and incubated for 6 to 24 hours. For non-patterned  
513 substrates, cells were seeded at the desired density and then incubated in 10% serum media  
514 for 6 to 24 hours. After this time, media was replaced with serum-free media and incubated  
515 for at least 24 hours prior to measurements. For isolated cells, the seeding density was 10<sup>2</sup>

516 cells per  $\text{cm}^2$ . For sparse cells, the seeding density was  $10^3$  cells per  $\text{cm}^2$ . For confluent cells,  
517 the seeding density was  $10^4$  cells per  $\text{cm}^2$ .

518 **Fluorescent imaging of  $\text{Ca}^{2+}$ :** Serum-starved airway SMCs were loaded with a fluorescent  
519 cytosolic  $\text{Ca}^{2+}$  indicator to record changes in  $[\text{Ca}^{2+}]$ . FLIPR  $\text{Ca}^{2+}$  6 (Molecular Devices, San  
520 Jose, CA, USA) was used for all  $\text{Ca}^{2+}$  measurements except Fig. 1A, S1A, where we used  
521 Fluo4-AM (Sigma Aldrich, St. Louis, MO, USA). The commonly used Fluo4-AM is prone  
522 to photobleaching, and the measured  $\text{Ca}^{2+}$  traces must be bleach-corrected prior to  
523 measurements of the time period. FLIPR  $\text{Ca}^{2+}$  6, on the other hand, did not photobleach  
524 even after 30 minutes of continuous imaging at 1 Hz. Fluo4-AM was prepared according to  
525 the manufacturer's standards. Cells were loaded with  $0.2 \mu\text{M}$  Fluo4-AM solution, diluted  
526 in HBSS, and incubated at room temperature for 1 hour. Next, the cells were washed with  
527 HBSS and incubated in the dark in HBSS for an additional 30 minutes. The cells were  
528 washed once more before imaging. FLIPR  $\text{Ca}^{2+}$  6 was also prepared according to  
529 manufacturer's standards. Cells were incubated with a 1:1 solution of FLIPR  $\text{Ca}^{2+}$  6 and  
530 serum-free media at  $37^\circ \text{C}$  and 5%  $\text{CO}_2$  for 2 hours before imaging. Both  $\text{Ca}^{2+}$  indicators  
531 use acetoxymethyl esters to pass through the cell membrane, which are then hydrolyzed by  
532 cytosolic esterases, trapping the fluorescent dye inside the cell. Cells were imaged with a  
533 Leica DMI8 inverted microscope, a Leica DFC6000 camera (Leica, Wetzlar, Germany), and  
534 a Lumencor Sola SEII LED light source (Lumencor, Beaverton, OR, USA). A FITC filter  
535 cube (excitation: 480/40 nm, emission: 527/50 nm) was used to image the fluorescent dye.  
536 Fluorescent intensity increases with increasing cytosolic  $[\text{Ca}^{2+}]$ . 16-bit images were  
537 recorded at 1 Hz for 1 minute before agonist addition, and for at least 5 minutes after  $10^{-5}$   
538 M histamine exposure. In order to analyze data, each image sequence was loaded in Fiji  
539 ImageJ, and regions of interest (ROIs) were hand-selected in the cytoplasm of each cell to  
540 obtain mean grayscale intensities over the area of the ROI for each frame in time. A custom

541 MATLAB (MathWorks, Natick, MA, USA) code was written to process the data and  
542 measure mean  $\text{Ca}^{2+}$  oscillation periods. This code measured mean  $\text{Ca}^{2+}$  oscillation periods  
543 by finding peaks in the time series data above a certain prominence and taking the mean of  
544 the time between all sequential peaks (Fig. S4).

545 **Cell traction force measurements:** The base NuSil substrates were coated with a layer of  
546 fluorescent beads as fiducial markers for traction force microscopy. A 5% solution of 0.2  
547  $\mu\text{m}$  diameter red fluorescent carboxylate-modified microspheres (FluoSpheres, Invitrogen,  
548 Carlsbad, CA, USA) in PBS was vortexed for 10 seconds. 2 mL of solution was added to  
549 each substrate in a Bioptech dish and left at room temperature for 1 hour to allow the beads  
550 to adhere. The bead solution was poured off, substrates were washed 3x with PBS, and then  
551 PBS was poured off. NuSil solution was prepared as described before, with the appropriate  
552 amount of crosslinker to match the stiffness of the base substrate. NuSil was spin-coated  
553 onto the newly bead-coated base substrate at 2500 RPM to create a 1  $\mu\text{m}$ -thick layer and  
554 seal the beads. These substrates rested on a flat surface for 1 hour before curing overnight  
555 at 60° C. Substrates were protein-coated and seeded with cells as before. After a 24 hour  
556 incubation in serum-free media, the SMC tractions were recorded by imaging the  
557 fluorescent beads with a 20x/0.55 dry objective and the Leica DMi8 microscope in an  
558 environmental chamber maintained humidified at 37° C. Images were taken at baseline,  
559 after a 15 minute incubation with  $10^{-5}$  M histamine, and after cells were removed using RLT  
560 Lysis Buffer (Qiagen, Hilden, Germany). Using these images, cellular forces were  
561 calculated with a custom MATLAB (MathWorks, Natick, MA) software program using  
562 Fourier Traction Force Microscopy (23).

563 **Fluorescent labeling of connexin-43/actin/nuclei:** Cells were fluorescently labeled for  
564 connexin-43 (Cx43) and filamentous actin (F-actin). Cells were fixed in 4%  
565 paraformaldehyde in PBS at room temperature for 10 minutes. Then, cells were

566 permeabilized with 100% ethanol for 10 minutes at 20° C. Following permeabilization, cells  
567 were blocked using 1x PBS containing 0.1% Tween-20, 1% bovine serum albumin (BSA),  
568 and 22.52 mg/ml glycine for 30 minutes at room temperature. Next, cells were stained for  
569 Cx43 (ab11370; Abcam, Cambridge, UK) at a dilution of 1:200 in 1x PBS containing 1%  
570 BSA for 1 hour at 37° C. Secondary antibody labeling and phalloidin staining were done  
571 simultaneously at dilutions of 1:200 and 1:40, respectively, using Alexa Fluor 594  
572 (ab150080; Abcam, Cambridge, UK) and Alexa Fluor 488 Phalloidin (A12379; Invitrogen,  
573 Carlsbad, CA, USA). Lastly, cells were labeled with NucBlue (Fisher Scientific, Waltham,  
574 MA, USA) to label cell nuclei. Images were acquired using a 63x/1.4 oil-immersion  
575 objective (Leica, Wetzlar, Germany).

576 **The gap-FRAP assay:** Gap Fluorescent Recovery After Photobleaching (FRAP) is an  
577 experimental technique that has been established as an effective method of observing gap-  
578 junctional communication of small fluorescent molecules between adjacent cells (22).  
579 SMCs were cultured on NuSil gels of E=0.3 kPa and E=13 kPa until confluence was  
580 achieved, and then serum-starved for at least 24 hours prior to the experiment. Cells were  
581 loaded with 1  $\mu$ M calcein-AM solution diluted in warmed 1x PBS solution and incubated at  
582 37° C and 5% CO<sub>2</sub> for 15 minutes. Calcein-AM is a cell-permeable dye that is hydrolyzed  
583 into fluorescent calcein by cytoplasmic esterases upon entry through cell membrane and has  
584 been shown to permeate through gap junctions due to its low molecular size (622 Da) (20).  
585 After dye incubation, samples were washed with warm 1x PBS solution and returned to  
586 serum-free medium for experiments. FRAP was performed using a ZEISS confocal laser  
587 scanning microscope system equipped with a 20x/0.8 objective and a 488 nm Argon laser.  
588 Fluorescence data was captured using ZEN 2012 SP5 imaging software (ZEISS,  
589 Oberkochen, Germany). Samples were placed in an incubation chamber maintaining 37° C  
590 during experiments to preserve cell viability during imaging. Prior to photobleaching, a



591 manual ROI was drawn around the border of a target cell visibly connected to adjacent cells.  
592 Whole cells were selected for photobleaching to ensure that fluorescence recovery could  
593 only be attributed to the diffusion of calcein from adjacent cells. Laser power was adjusted  
594 to 1% and images were acquired every 5 seconds for 50 seconds using scan speed 12 (pixel  
595 dwell = 0.42  $\mu$ s) to provide baseline fluorescence measurements. After baseline scans were  
596 acquired, the laser power was adjusted to 100% and cells were bleached to at least 20% of  
597 their initial fluorescence using scan speed 2 (pixel dwell = 40  $\mu$ s). Following the bleaching  
598 step, fluorescence recovery images were collected every 5 seconds for approximately 5 mins  
599 at 1% laser power. The images from gap-FRAP experiments were analyzed using Fiji  
600 ImageJ software. First, baseline fluorescence intensities from the target cell were averaged  
601 over the first 10 frames captured to establish a reference value for fluorescence recovery.  
602 Next, fluorescence intensities were measured during the recovery period and divided by the  
603 average baseline intensity to normalize the data. To account for any photobleaching  
604 occurring during the recovery period, fluorescence intensities were collected from a region  
605 at the edge of the field of view. These values were used to adjust the intensity of the target  
606 cell over time to account for fluorescence degradation due to repeated scanning of the  
607 microscopic field, since the edge region was not affected directly during the bleaching step.  
608 The normalized fluorescence values of the bleached cell during recovery were plotted as a  
609 function of time. To compare fluorescence recovery across multiple sample groups, the  
610 mobile fraction of fluorescent molecules was calculated. Mobile fraction ( $\Gamma$ ) measures the  
611 fraction of fluorescent molecules that contribute to recovery of fluorescence in bleached  
612 cells and is calculated with Eq. 1, where  $F_0$ ,  $F_b$ ,  $F_r$  indicate the fluorescence intensity in the  
613 cell being bleached at baseline, after bleaching and after recovery, respectively (Fig. 3E).

614 **Gap junction blocker experiments:** Gap junctions between confluent SMCs were blocked  
615 with 18 $\beta$ -glycyrrhetic acid ( $\beta$ GA) (Sigma Aldrich, St. Louis, MO, USA). Confluent SMCs

616 on soft ( $E=0.3$  kPa) and stiff ( $E=13$  kPa) substrates were incubated with  $30\ \mu\text{M}$   $\beta\text{GA}$  at  $37^\circ$   
617 C and  $5\%$   $\text{CO}_2$  for 30 minutes. Although  $\beta\text{GA}$  is a common gap junction blocker, it has been  
618 reported to affect cell viability at higher concentrations (21). We used gap-FRAP to find the  
619 lowest possible dose of  $\beta\text{GA}$  that still blocked gap junctions between confluent cells, which  
620 we used here in our experiments. This treatment was used in conjunction with the  $\text{Ca}^{2+}$   
621 imaging protocol to investigate the role of gap junctional diffusion in agonist-induced  $\text{Ca}^{2+}$   
622 oscillations.

623 **Force-inhibitor experiments:** Smooth muscle cell contractile force was reduced with two  
624 separate inhibitors of force: Y-27362 (Sigma Aldrich, St. Louis, MO, USA), a specific  
625 inhibitor of ROCK, and ML-7 (Sigma Aldrich, St. Louis, MO, USA), a selective inhibitor  
626 of MLCK. Confluent SMCs on soft (0.3 kPa) and stiff (13 kPa) substrates were pre-  
627 incubated with  $10\ \mu\text{M}$  or  $100\ \mu\text{M}$  of Y-27632 for 1 hour, or  $0.01\ \mu\text{M}$  or  $0.05\ \mu\text{M}$  of ML-7  
628 for 5 minutes, in tandem with the 2 hour FLIPR  $\text{Ca}^{2+}$  6 indicator incubation, before  
629 experiments.  $\text{Ca}^{2+}$  imaging and  $10^{-5}$  M histamine addition was added as previously  
630 described.

631 **Data presentation and statistical testing:** Throughout the manuscript, we represent data  
632 as the average of N independent trials. The error bars indicate standard deviation over  
633 independent trials. The individual data points are shown in all bar plots. Each data point is  
634 in turn the average of measurements made over multiple cells within one trial. Sigmatat  
635 (Systat Software, San Jose, CA) was used to perform statistical tests. Two-Way ANOVAs  
636 followed by posthoc pairwise comparisons were used to test for significant differences in  
637 datasets which were influenced by two independent factors. One-Way ANOVAs followed  
638 by posthoc pairwise comparisons were used to test for significant differences in datasets of  
639 three or more groups which were influenced by one independent factor. Pairwise  
640 comparisons used the t-test when the data was normally distributed. Otherwise, the Mann-

641 Whitney Rank Sum Test was used to compare the median values. The specific tests used,  
642 the number of samples and the P-value are described along with the corresponding results.  
643 A P-value of 0.05 was used as the threshold for a statistically significant difference between  
644 data sets.

## 645 **References and Notes**

- 646 1. B. B. Araujo, M. Dolhnikoff, L. F. F. Silva, J. Elliot, J. H. N. Lindeman, D. S. Ferreira, A.  
647 Mulder, H. A. P. Gomes, S. M. Fernezlian, A. James, T. Mauad, Extracellular matrix  
648 components and regulators in the airway smooth muscle in asthma. *Eur. Respir. J. Off. J.*  
649 *Eur. Soc. Clin. Respir. Physiol.* **32**, 61–9 (2008).
- 650 2. A. L. James, J. G. Elliot, R. L. Jones, M. L. Carroll, T. Mauad, T. R. Bai, M. J. Abramson,  
651 K. O. McKay, F. H. Green, Airway smooth muscle hypertrophy and hyperplasia in asthma.  
652 *Am. J. Respir. Crit. Care Med.* **185**, 1058–1064 (2012).
- 653 3. R. Saunders, H. Kaul, R. Berair, S. Gonem, A. Singapuri, A. J. Sutcliffe, L. Chachi, M. S.  
654 Biddle, D. Kaur, M. Bourne, I. D. Pavord, A. J. Wardlaw, S. H. Siddiqui, R. A. Kay, B. S.  
655 Brook, R. H. Smallwood, C. E. Brightling, DP2 antagonism reduces airway smooth muscle  
656 mass in asthma by decreasing eosinophilia and myofibroblast recruitment. *Sci. Transl.*  
657 *Med.* **11**, eaao6451 (2019).
- 658 4. B. C. Berk, K. Fujiwara, S. Lehoux, ECM remodeling in hypertensive heart disease. *J.*  
659 *Clin. Invest.* **117**, 568–75 (2007).
- 660 5. T. Thenappan, S. Y. Chan, E. K. Weir, Role of extracellular matrix in the pathogenesis of  
661 pulmonary arterial hypertension. *Am. J. Physiol. Heart Circ. Physiol.* **315**, H1322–H1331  
662 (2018).
- 663 6. M. J. Sanderson, P. Delmotte, Y. Bai, J. F. Perez-Zogbhi, Regulation of airway smooth  
664 muscle cell contractility by Ca<sup>2+</sup> signaling and sensitivity. *Proc. Am. Thorac. Soc.* **5**, 23–  
665 31 (2008).

- 666 7. Y. S. Prakash, M. S. Kannan, G. C. Sieck, Regulation of intracellular calcium oscillations  
667 in porcine tracheal smooth muscle cells. *Am. J. Physiol.* **272**, C966-75 (1997).
- 668 8. D. C. Hill-Eubanks, M. E. Werner, T. J. Heppner, M. T. Nelson, Calcium signaling in  
669 smooth muscle. *Cold Spring Harb. Perspect. Biol.* **3**, a004549 (2011).
- 670 9. J. F. Perez, M. J. Sanderson, The frequency of calcium oscillations induced by 5-HT, ACH,  
671 and KCl determine the contraction of smooth muscle cells of intrapulmonary bronchioles.  
672 *J. Gen. Physiol.* **125**, 535–553 (2005).
- 673 10. A. B. Parekh, Decoding cytosolic Ca<sup>2+</sup> oscillations. *Trends Biochem. Sci.* **36**, 78–87  
674 (2011).
- 675 11. H. Yoshie, N. Koushki, R. Kaviani, M. Tabatabaei, K. Rajendran, Q. Dang, A. Husain, S.  
676 Yao, C. Li, J. K. Sullivan, M. Saint-Geniez, R. Krishnan, A. J. Ehrlicher, Traction Force  
677 Screening Enabled by Compliant PDMS Elastomers. *Biophys. J.* **114**, 2194–2199 (2018).
- 678 12. S. R. Polio, S. E. Stasiak, R. R. Jamieson, J. L. Balestrini, R. Krishnan, H. Parameswaran,  
679 Extracellular matrix stiffness regulates human airway smooth muscle contraction by  
680 altering the cell-cell coupling. *Sci. Rep.* **9**, 9564 (2019).
- 681 13. N. T. Tgavalekos, M. Tawhai, R. S. Harris, G. Musch, G. Mush, M. Vidal-Melo, J. G.  
682 Venegas, K. R. Lutchen, Identifying airways responsible for heterogeneous ventilation and  
683 mechanical dysfunction in asthma: an image functional modeling approach. *J. Appl.*  
684 *Physiol.* **99**, 2388–2397 (2005).
- 685 14. D. Mitrossilis, J. Fouchard, A. Guiroy, N. Desprat, N. Rodriguez, B. Fabry, A. Asnacios,  
686 Single-cell response to stiffness exhibits muscle-like behavior. *Proc. Natl. Acad. Sci.* **106**,  
687 18243–18248 (2009).
- 688 15. H. Parameswaran, K. R. Lutchen, B. Suki, A computational model of the response of  
689 adherent cells to stretch and changes in substrate stiffness. *J. Appl. Physiol.* **116**, 825–834  
690 (2014).

- 691 16. M. T. Kirber, J. V Walsh, J. J. Singer, Stretch-activated ion channels in smooth muscle: a  
692 mechanism for the initiation of stretch-induced contraction. *Pflugers Arch.* **412**, 339–45  
693 (1988).
- 694 17. S. S. An, B. Fabry, X. Trepatt, N. Wang, J. J. Fredberg, Do biophysical properties of the  
695 airway smooth muscle in culture predict airway hyperresponsiveness? *Am. J. Respir. Cell*  
696 *Mol. Biol.* **35**, 55–64 (2006).
- 697 18. L. Leybaert, M. J. Sanderson, Intercellular Ca(2+) waves: mechanisms and function.  
698 *Physiol. Rev.* **92**, 1359–92 (2012).
- 699 19. L. Leybaert, IP3, still on the move but now in the slow lane. *Sci. Signal.* **9**, fs17–fs17  
700 (2016).
- 701 20. M. Abbaci, M. Barberi-Heyob, J. R. Stines, W. Blondel, D. Dumas, F. Guillemin, J.  
702 Didelon, Gap junctional intercellular communication capacity by gap-FRAP technique: A  
703 comparative study. *Biotechnol. J.* **2**, 50–61 (2007).
- 704 21. X. Guan, S. Wilson, K. K. Schlender, R. J. Ruch, Gap-junction disassembly and connexin  
705 43 dephosphorylation induced by 18β-glycyrrhetic acid. *Mol. Carcinog.* **16**, 157–164  
706 (1996).
- 707 22. M. Kuzma-Kuzniarska, C. Yapp, T. W. Pearson-Jones, A. K. Jones, P. A. Hulley,  
708 Functional assessment of gap junctions in monolayer and three-dimensional cultures of  
709 human tendon cells using fluorescence recovery after photobleaching. *J. Biomed. Opt.* **19**,  
710 015001 (2014).
- 711 23. J. P. Butler, I. M. Tolić-Nørrelykke, B. Fabry, J. J. Fredberg, Traction fields, moments, and  
712 strain energy that cells exert on their surroundings. *Am. J. Physiol. Cell Physiol.* **282**,  
713 C595-605 (2002).
- 714 24. F. Liu, J. D. Mih, B. S. Shea, A. T. Kho, A. S. Sharif, A. M. Tager, D. J. Tschumperlin,  
715 Feedback amplification of fibrosis through matrix stiffening and COX-2 suppression. *J.*

- 716 *Cell Biol.* **190**, 693–706 (2010).
- 717 25. T. R. Cox, J. T. Epler, Remodeling and homeostasis of the extracellular matrix:  
718 implications for fibrotic diseases and cancer. *Dis. Model. Mech.* **4**, 165–78 (2011).
- 719 26. A. M. Briones, S. M. Arribas, M. Salices, Role of extracellular matrix in vascular  
720 remodeling of hypertension. *Curr. Opin. Nephrol. Hypertens.* **19**, 187–94 (2010).
- 721 27. A. R. Harper, J. A. Summers, The dynamic sclera: extracellular matrix remodeling in  
722 normal ocular growth and myopia development. *Exp. Eye Res.* **133**, 100–11 (2015).
- 723 28. J. M. Phillip, I. Aifuwa, J. Walston, D. Wirtz, The Mechanobiology of Aging. *Annu. Rev.*  
724 *Biomed. Eng.* **17**, 113–141 (2015).
- 725 29. M. C. Lampi, C. A. Reinhart-King, Targeting extracellular matrix stiffness to attenuate  
726 disease: From molecular mechanisms to clinical trials. *Sci. Transl. Med.* (2018),  
727 doi:10.1126/scitranslmed.aao0475.
- 728 30. J. A. Sparano, P. Bernardo, P. Stephenson, W. J. Gradishar, J. N. Ingle, S. Zucker, N. E.  
729 Davidson, Randomized Phase III Trial of Marimastat Versus Placebo in Patients With  
730 Metastatic Breast Cancer Who Have Responding or Stable Disease After First-Line  
731 Chemotherapy: Eastern Cooperative Oncology Group Trial E2196. *J. Clin. Oncol.* **22**,  
732 4683–4690 (2004).
- 733 31. A. Winer, S. Adams, P. Mignatti, Matrix Metalloproteinase Inhibitors in Cancer Therapy:  
734 Turning Past Failures Into Future Successes. *Mol. Cancer Ther.* **17**, 1147–1155 (2018).
- 735 32. K. K. Chiou, J. W. Rocks, C. Yingxian, S. Cho, K. E. Merkus, A. Rajaratnam, C. Y. Chen,  
736 S. Cho, K. E. Merkus, A. Rajaratnam, P. Robison, M. Tewari, K. Vogel, S. F. Majkut, B.  
737 L. Prosser, D. E. Discher, A. J. Liu, Mechanical signaling coordinates the embryonic  
738 heartbeat. *Proc. Natl. Acad. Sci. U. S. A.* **113**, 8939–44 (2016).
- 739 33. N. L. Allbritton, T. Meyer, L. Stryer, Range of messenger action of calcium ion and  
740 inositol 1,4,5-triphosphate. *Science (80- )*. **258**, 1812–1815 (1992).

- 741 34. G. D. Dickinson, K. L. Ellefsen, S. P. Dawson, J. E. Pearson, I. Parker, Hindered  
742 cytoplasmic diffusion of inositol trisphosphate restricts its cellular range of action. *Sci.*  
743 *Signal.* **9**, ra108–ra108 (2016).
- 744 35. J. A. Felix, M. L. Woodruff, E. R. Dirksen, Stretch increases inositol 1,4,5-trisphosphate  
745 concentration in airway epithelial cells. *Am. J. Respir. Cell Mol. Biol.* **14**, 296–301 (1996).
- 746 36. Y. Tanaka, S. Hata, H. Ishiro, K. Ishii, K. Nakayama, Quick stretch increases the  
747 production of inositol 1,4,5-trisphosphate (IP3) in porcine coronary artery. *Life Sci.* **55**,  
748 227–235 (1994).
- 749 37. S. S. An, T. R. Bai, J. H. T. Bates, J. L. Black, R. H. Brown, V. Brusasco, P. Chitano, L.  
750 Deng, M. Dowell, D. H. Eidelman, B. Fabry, N. J. Fairbank, L. E. Ford, J. J. Fredberg, W.  
751 T. Gerthoffer, S. H. Gilbert, R. Gosens, S. J. Gunst, A. J. Halayko, R. H. Ingram, C. G.  
752 Irvin, A. L. James, L. J. Janssen, G. G. King, D. a Knight, A. M. Lauzon, O. J. Lakser, M.  
753 S. Ludwig, K. R. Lutchen, G. N. Maksym, J. G. Martin, T. Mauad, B. E. McParland, S. M.  
754 Mijailovich, H. W. Mitchell, R. W. Mitchell, W. Mitzner, T. M. Murphy, P. D. Paré, R.  
755 Pellegrino, M. J. Sanderson, R. R. Schellenberg, C. Y. Seow, P. S. P. Silveira, P. G. Smith,  
756 J. Solway, N. L. Stephens, P. J. Sterk, a G. Stewart, D. D. Tang, R. S. Tepper, T. Tran, L.  
757 Wang, Airway smooth muscle dynamics: a common pathway of airway obstruction in  
758 asthma. *Eur. Respir. J. Off. J. Eur. Soc. Clin. Respir. Physiol.* **29**, 834–60 (2007).
- 759 38. J. J. Fredberg, D. Inouye, B. Miller, M. Nathan, S. Jafari, S. H. Raboudi, J. P. Butler, S. A.  
760 Shore, Airway smooth muscle, tidal stretches, and dynamically determined contractile  
761 states. *Am. J. Respir. Crit. Care Med.* **156**, 1752–1759 (1997).
- 762 39. H. R. W. Wirtz, L. G. Dobbs, Calcium Mobilization and Exocytosis After One Mechanical  
763 Stretch of Lung Epithelial Cells. *Science (80- )*. **250**, 1266–1269 (1990).
- 764 40. R. Krishnan, C. Y. Park, Y. C. Lin, J. Mead, R. T. Jaspers, X. Trepap, G. Lenormand, D.  
765 Tambe, A. V. Smolensky, A. H. Knoll, J. P. Butler, J. J. Fredberg, Reinforcement versus

766 fluidization in cytoskeletal mechanoresponsiveness. *PLoS One*. **4** (2009),

767 doi:10.1371/journal.pone.0005486.

768

769 **Acknowledgments: Funding:** This work was supported by NIH grants HL129468 and HL122513

770 (HP) and GM110268 (EJC). **Author contributions:** SS & HP conceived the idea and designed the

771 experiments. With few exceptions, all experimental measurements and data analysis were

772 performed by SS. RR and JB performed the gap-FRAP experiments. RR also performed the gap

773 junction staining. SS, RR, JB, EJC & HP contributed to writing the manuscript and analysis of the

774 data. HP is the corresponding author who conceived and directed this project.

775

776 **Competing interests:** The authors declare that they have no competing interests.

777

778 **Data and materials availability:** Data supporting the findings of this study are available within

779 the manuscript. All other relevant data are available from authors upon reasonable request.

780

## 781 **Figures and Tables**

782 **Fig. 1. Effect of matrix stiffness on agonist-induced  $\text{Ca}^{2+}$  oscillations in SMCs.** (A) To

783 study the role of altered matrix stiffness on the time period of agonist-induced

784  $\text{Ca}^{2+}$  oscillations, we micropatterned a 2D approximation of the in-situ organization

785 of SMCs. Cells were also cultured on non-patterned surfaces in three different

786 densities: (B) isolated, (C) sparse, and (D) confluent. The colors in Figs 1A-D

787 correspond to cytosolic  $[\text{Ca}^{2+}]$  concentrations as indicated by the color bar in Fig.

788 1A. Scale bars=200  $\mu\text{m}$ . (E) Increasing matrix stiffness from 0.3 kPa to 13 kPa

789 caused a significant decrease in  $\text{Ca}^{2+}$  oscillation period in SMCs rings (t-test,

790  $P < 0.001$ ,  $N = 4$  each). (F, G) The periods of SMC  $\text{Ca}^{2+}$  oscillations were not affected



791 by matrix stiffness in both isolated (soft N=14, stiff N=12) and sparse (N=4 each)  
792 conditions (t-test, P=0.93, P=0.481, respectively). **(H)** Confluent cells behaved like  
793 those patterned in a ring, with cells plated on stiff matrix exhibiting significantly  
794 faster Ca<sup>2+</sup> oscillations in response to 10<sup>-5</sup> M histamine compared to those on a soft  
795 matrix (soft N=5, stiff N=7, Mann-Whitney Rank Sum Test, P=0.003). These results  
796 demonstrate that matrix stiffness can modulate the agonist-induced Ca<sup>2+</sup> response of  
797 confluent SMCs, but not that of isolated cells.

798 **Fig. 2. Effect of matrix stiffness and confluence on the correlated nature of Ca<sup>2+</sup>**

799 **oscillations.** **(A)** The cross-correlation coefficients ( $\rho_{i,j}$ ) range in values from 1  
800 (positively correlated, pink) to 0 (uncorrelated, white) to -1 (negatively correlated,  
801 green), as shown in a representative 24x24 cell matrix. **(B)** Examples of Ca<sup>2+</sup>  
802 oscillations measured in two cells with high pairwise-correlation ( $\rho=0.78$ ), and low  
803 pairwise correlation ( $\rho=0.02$ ). **(C)** In isolated cells, the Ca<sup>2+</sup> oscillations were  
804 generally uncorrelated with a probability density function centered around zero.  
805 ECM stiffness did not affect pairwise correlations in isolated SMCs (N=5 soft, N=4  
806 stiff, P=0.733, Two-Way ANOVA). **(D)** In confluent cells, there is a statistically  
807 significant increase in  $\rho$ , indicating that the Ca<sup>2+</sup> oscillations were more  
808 synchronized on stiffer ECM (N=4 soft, N=5 stiff, Two-Way ANOVA, P=0.007).  
809 **(E, F)** To evaluate the time it takes after agonist addition for Ca<sup>2+</sup> oscillations to  
810 become synchronized, we calculated  $\rho_{i,j}(\tau)$  within a 120s moving window. **(E)**  $\rho_{i,j}(\tau)$   
811 in isolated cells does not change over time (N=5 soft, N=4 stiff, P=0.274) or with  
812 stiffness (P=0.303) (Two-Way ANOVA). However, **(F)** in confluent cells on stiff  
813 matrix,  $\rho_{i,j}(\tau)$  shows a significant increase after 30 seconds (N=4 soft, N=5 stiff)  
814 (Two-Way ANOVA, P<0.001). Error bars indicate standard deviation.

815 **Fig. 3. Effect of matrix stiffness on intercellular communication via gap junctions.**

816 Confluent SMCs on soft (A) and stiff (B) matrix were stained for the gap junction  
817 protein Cx43, actin, and the nucleus. (C) Gap junctions were counted for each SMC  
818 in individual frames on soft (N=5) and stiff (N=5) matrix, represented by the mean  
819 and standard deviation of these measurements, and we found no statistical difference  
820 due to matrix stiffening (t-test, P=0.977). (D) Diffusion through gap junctions was  
821 quantified by bleaching a small fluorescent molecule within a cell and measuring  
822 signal recovery due to intercellular diffusion, a technique called gap-FRAP. (E) A  
823 representative recovery curve for one cell shows a recovery of ~40% its initial  
824 fluorescence. These values were used to calculate mobile fraction, a measure of  
825 diffusion efficiency through gap junctions. (F) Matrix stiffness had no effect on  
826 mobile fraction (t-test, soft N=16, stiff N=18, P=0.532). The gap junction blocker  
827  $\beta$ GA significantly reduced the recovery (D) and mobile fraction (F) (N=18, Mann-  
828 Whitney Rank Sum Test). (G) Despite blocking gap junctions with  $\beta$ GA, there was  
829 no effect on  $\text{Ca}^{2+}$  oscillation periods in confluent cells on either soft (N=6) or stiff  
830 (N=4) matrix (Two-Way ANOVA, P=0.784 treatment within stiffness). Scale bars=  
831 30  $\mu\text{m}$ .

832 **Fig. 4. Role of mechanical force in  $\text{Ca}^{2+}$  wave propagation through multicellular**

833 **ensembles of SMCs.** (A) SMCs in confluent layers form organized clusters of cells,  
834 with certain cells aligned end-to-end along their contractile axis (parallel), and others  
835 branching off at an angle (perpendicular). Scale bar=250  $\mu\text{m}$ . Insets (a), (b) show  
836 cells 2 and 4 parallel to the contractile axis of cell 1, whereas cells 3 and 5 are  
837 perpendicular. Inset scale bars=50  $\mu\text{m}$ . The conditional probability for a localized  
838 increase in  $\text{Ca}^{2+}$  in cell 1 to be followed by an increase in a parallel or perpendicular  
839 neighbor is plotted in (B) with mean and standard deviation.  $\text{Ca}^{2+}$  waves were

840 statistically more likely to propagate along the contractile axis (t-test, N=10). **(C)**  
841 Histamine caused a significantly greater increase in traction stress in confluent cells  
842 on stiff matrix (N=21) rather than on soft (N=12, t-test). **(D)** The faster agonist-  
843 induced  $\text{Ca}^{2+}$  oscillations on stiff ECM were systematically abrogated in a dose-  
844 dependent manner by preincubating the SMCs with the ROCK inhibitor Y-27632  
845 for 1 hour prior to histamine exposure (N=3, N=4,  $P < 0.001$ , One-Way ANOVA).  
846 Identical results can be obtained with MLCK inhibition by preincubating with  
847 increasing doses of ML-7 for 5 minutes (N=3 each,  $P < 0.001$ , One-Way ANOVA).

848 **Fig. 5. Effect of confining SMCs in a line using micropatterning.** **(A)** When SMCs were  
849 patterned in lines, **(B)** the probability of finding SMCs with high time periods  
850 decreased and the variance of the time periods from aligned cells was significantly  
851 smaller than confluent cells (F-test,  $P < 0.001$ ). Matrix stiffness still affected the  
852 oscillation period (soft N=8, stiff N=6, Mann-Whitney Rank Sum Test). To probe  
853 the limits of the SMC cluster's collective matrix sensing abilities, we simulated  
854 localized ECM stiffening by **(C)** patterning SMCs in lines spanning a dual-stiffness  
855 PDMS substrate (E=13 kPa highlighted in green, left, and E=0.3 kPa, right). **(D)** The  
856  $\text{Ca}^{2+}$  oscillation time period of cells along lines is plotted as a function of the distance  
857 from the stiff matrix. Binning cells in 400  $\mu\text{m}$  intervals, only those over 800  $\mu\text{m}$   
858 from stiff matrix had different  $\text{Ca}^{2+}$  oscillation time periods from cells directly in  
859 contact (t-test, N=4). Scale bars=250  $\mu\text{m}$ .

1 **Supplementary Materials**

2 **Materials and Methods**

3 **Fabrication of NuSil substrates at additional stiffnesses:** Equal parts of NuSil gel-8100 parts A  
4 and B (NuSil, Carpinteria, CA, USA) were mixed with various amounts of the crosslinking  
5 compound of Sylgard 184 (Dow Corning, Midland, MI, USA) to adjust substrate stiffness.  
6 Crosslinker volumes of 0.07% and 0.15% of the combined volumes of parts A and B were added  
7 to the 1:1 A:B mixture to create substrates with Young's modulus  $E = 0.6$  kPa and 3 kPa,  
8 respectively. The spinning and curing protocol to finish the substrates can be found in the main  
9 manuscript.

10 **Histamine dose-response experiment:** Confluent SMCs cultured on soft (0.3 kPa) and stiff (13  
11 kPa) substrates were incubated with FLIPR  $Ca^{2+}$  6 indicator and imaged following the protocol in  
12 the main manuscript. For each sample, histamine concentration was gradually increased and  
13 followed by 5 minutes of imaging. Stiff samples were exposed to concentrations increasing from  
14  $10^{-6}$  M, to  $10^{-5}$  M, to  $10^{-4}$  M, and soft samples were exposed to concentrations of  $10^{-5}$  M,  $10^{-4}$  M,  
15 and  $10^{-3}$  M histamine.

16

17

18

19

20

21

22 **Figures**

23 **Fig. S1.**

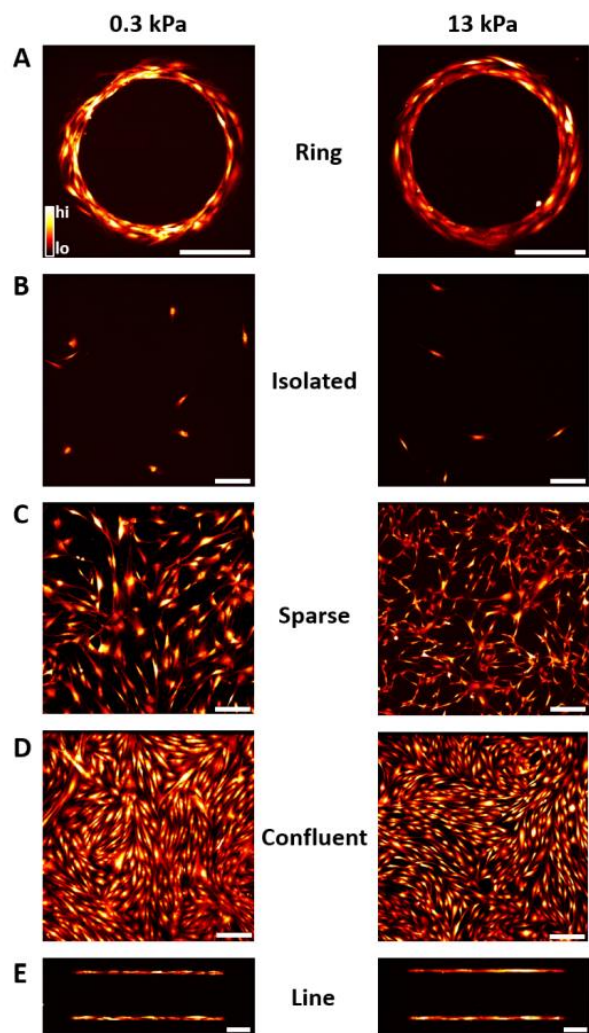

24

25 **Fig. S1. Morphology of SMCs on soft and stiff substrates.** Fluorescent images of cytosolic Ca<sup>2+</sup>  
26 in SMCs show similar appearance and density of cells in the different culture conditions used in  
27 this paper: (A) rings, (B) isolated, (C) sparse, (D) confluent, and (E) lines. The cytosolic [Ca<sup>2+</sup>] is  
28 pseudo-colored following the color bar, as in Fig. 1. Scale bar = 200  $\mu$ m.

29

30

31 **Fig. S2.**

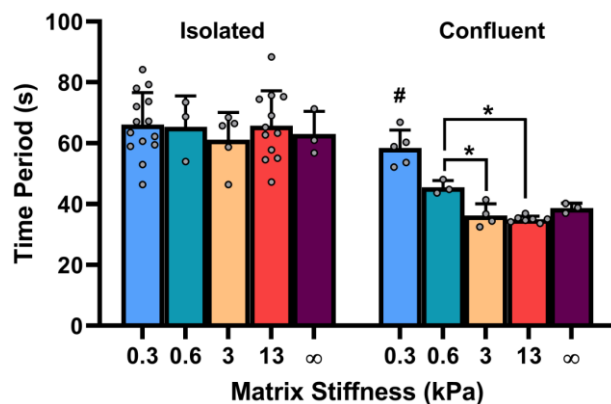

32

33 **Fig. S2. Effect of incremental matrix stiffening on agonist-induced  $\text{Ca}^{2+}$  oscillations in SMCs.**

34 PDMS substrate stiffness was tuned between our limits for soft (0.3 kPa) and stiff (13 kPa) matrix  
35 to create two intermediate stiffness matrices at 0.6 kPa and 3 kPa. Glass coverslips were used to  
36 represent matrix of infinite stiffness. In confluent cells, ECM stiffness had a significant impact on  
37 agonist-induced  $\text{Ca}^{2+}$  oscillation time periods (One-Way ANOVA,  $P < 0.001$ ). Pairwise  
38 comparisons with a Holm-Sidak test are indicated by symbols. The time period at 0.3 kPa was  
39 significantly different from all other substrate stiffnesses (indicated by #,  $P < 0.001$ ). The time  
40 period at 0.6 kPa was also significantly different from that at 3 kPa and 13 kPa ( $P = 0.003$ ,  $P < 0.001$ ,  
41 respectively). There was no statistical difference between time periods at 3 kPa, 13 kPa and glass  
42 (3 kPa vs. 13 kPa  $P = 0.566$ , 3 kPa vs. glass  $P = 0.379$ , 13 kPa vs. glass  $P = 0.017$ , respectively). Matrix  
43 stiffness had no effect on the agonist-induced  $\text{Ca}^{2+}$  response in isolated cells (One-Way ANOVA,  
44  $P = 0.907$ ).

45

46

47

48 **Fig. S3.**

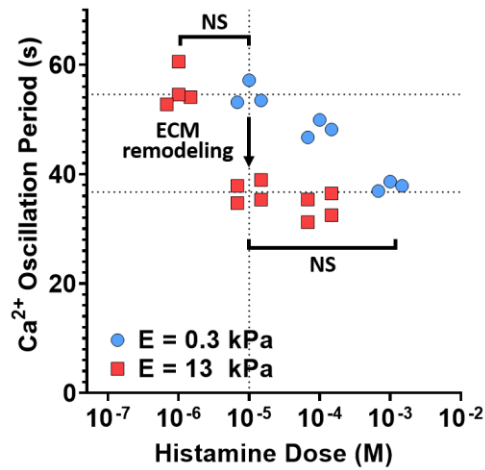

49

50 **Fig. S3. Effect of histamine dose on Ca<sup>2+</sup> oscillation time period for cells on soft and stiff**

51 **ECM.** Confluent SMCs on soft and stiff matrix were exposed to multiple doses of histamine.

52 Increasing concentration of histamine from 10<sup>-5</sup> M to 10<sup>-3</sup> M systematically decreased the mean

53 Ca<sup>2+</sup> oscillation time periods of cells on soft matrix (One-Way ANOVA, P<0.005). On stiff matrix,

54 increasing histamine dose from 10<sup>-6</sup> M to 10<sup>-5</sup> M caused a dramatic decrease in time period, but

55 increasing the dose further had no effect (One-Way ANOVA, P<0.001, P=0.174, respectively).

56 For SMCs on soft (E=0.3 kPa) substrate, the histamine dose needs to be increased from 10<sup>-5</sup> M to

57 10<sup>-3</sup> M (2 log scales higher) to match the Ca<sup>2+</sup> response of SMCs on the stiff substrate.

58

59

60

61

62

63

64 **Fig. S4.**

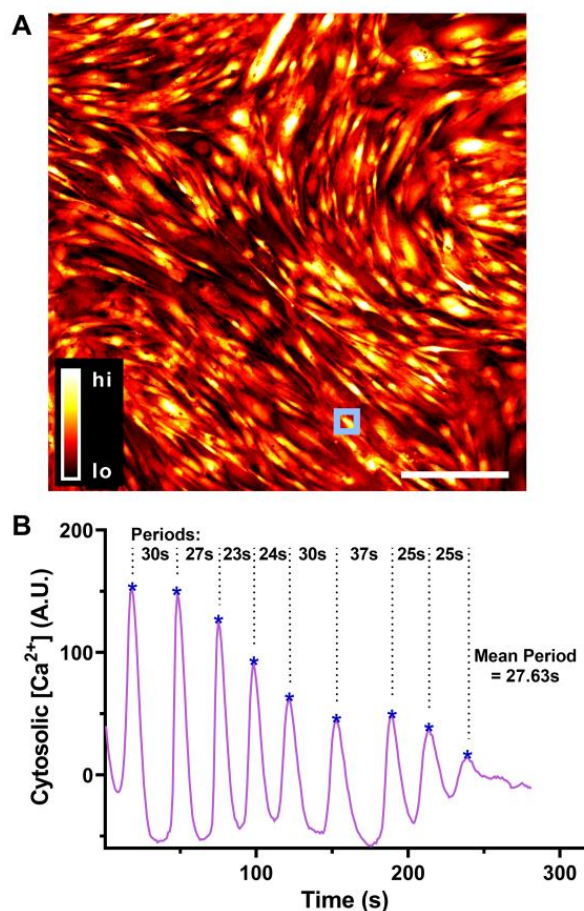

65

66 **Fig. S4. Method of calculating Ca<sup>2+</sup> oscillation periods.** (A) Images for each experiment were  
67 loaded into Image J, and 5x5 pixel regions of interest (ROIs) were hand-selected in the cytosol of  
68 the smooth muscle cell. The mean gray intensity of each ROI for each frame was imported into  
69 MATLAB and plotted to show changes over time for each cell. The Ca<sup>2+</sup> indicator used in our  
70 experiments indicates cytosolic [Ca<sup>2+</sup>], therefore changes in grayscale intensity correspond with  
71 changes in cytosolic [Ca<sup>2+</sup>]. (B) The portion of data after the initial spike in Ca<sup>2+</sup> due to histamine  
72 addition was selected for further processing. First, the code subtracted the mean [Ca<sup>2+</sup>] value of  
73 each time series from the time series. Next, local peaks above a threshold value were identified  
74 (indicated by \*), and the time between sequential peaks were recorded as oscillation periods. Time



75 periods are measured for a minimum of 40 cells/trial in confluent cells and for every SMC in  
76 isolated cells. The average time period of all measured cells is reported for each independent trial.

### 77 **Movies S1 to S4 Captions**

78 **Movie S1. Cytosolic Ca<sup>2+</sup> oscillations in confluent smooth muscle cells on stiff**  
79 **matrix.** Confluent SMCs on stiff matrix (E=13 kPa) loaded with a fluorescent Ca<sup>2+</sup> indicator were  
80 imaged before and during exposure to a 10<sup>-5</sup> M dose of the contractile agonist histamine, added at  
81 the time indicated. This movie shows the first 2.5 minutes of the experiment. The movie is  
82 compressed to 8 bit and 0.25 frames/second to match journal data guidelines. The full 5 minutes  
83 of Ca<sup>2+</sup> oscillations recorded at 1 frame/second, 16-bit, 2048 x 2048 images used to make  
84 measurements is available from the authors on reasonable request. Scale bar = 200 μm.

85 **Movie S2. Cytosolic Ca<sup>2+</sup> oscillations in confluent smooth muscle cells on soft**  
86 **matrix.** Confluent SMCs on soft matrix (E=0.3 kPa) loaded with a fluorescent Ca<sup>2+</sup> indicator were  
87 imaged before and during exposure to a 10<sup>-5</sup> M dose of the contractile agonist histamine, added at  
88 the time indicated. This movie shows the first 2.5 minutes of the experiment. The movie is  
89 compressed to 8 bit and 0.25 frames/second to match journal data guidelines. The full 5 minutes  
90 of Ca<sup>2+</sup> oscillations recorded at 1 frame/second, 16-bit, 2048 x 2048 images used to make  
91 measurements is available from the authors on reasonable request. Scale bar = 200 μm.

92 **Movie S3. Cytosolic Ca<sup>2+</sup> oscillations in isolated smooth muscle cells on stiff matrix.** Isolated  
93 SMCs on stiff matrix (E=13 kPa) loaded with a fluorescent Ca<sup>2+</sup> indicator were imaged before and  
94 during exposure to a 10<sup>-5</sup> M dose of the contractile agonist histamine, added at the time indicated.  
95 This movie shows the first 2.5 minutes of the experiment. The movie is compressed to 8 bit and  
96 0.25 frames/second to match journal data guidelines. The full 5 minutes of Ca<sup>2+</sup> oscillations  
97 recorded at 1 frame/second, 16-bit, 2048 x 2048 images used to make measurements is available

98 from the authors on reasonable request. Scale bar = 200  $\mu\text{m}$ .

99 **Movie S4. Cytosolic  $\text{Ca}^{2+}$  oscillations in isolated smooth muscle cells on soft matrix.** Isolated

100 SMCs on soft matrix ( $E=0.3$  kPa) loaded with a fluorescent  $\text{Ca}^{2+}$  indicator were imaged before and

101 during exposure to a  $10^{-5}$  M dose of the contractile agonist histamine, added at the time indicated.

102 This movie shows the first 2.5 minutes of the experiment. The movie is compressed to 8 bit and

103 0.25 frames/second to match journal data guidelines. The full 5 minutes of  $\text{Ca}^{2+}$  oscillations

104 recorded at 1 frame/second, 16-bit, 2048 x 2048 images used to make measurements is available

105 from the authors on reasonable request. Scale bar = 200  $\mu\text{m}$ .
